# Supplementary material
Source: publisher figshare collection journal article supplement (https://sage.figshare.com/ndownloader/files/22781912)
Supplement: Supplementary file 1 [file 22781912 › Supplemental Material.pdf]

# **Journal of Health and Social Behavior**

OFFICIAL JOURNAL OF THE AMERICAN SOCIOLOGICAL ASSOCIATION

**ONLINE SUPPLEMENT**

**to article in**

Journal of Health and Social Behavior, 2020, Vol. 61, Issue 2

**Status Variation in Anticipatory Stressors and Their Associations with Depressive  
Symptoms**

**Matthew K. Grace**  
*Hamilton College*

**Appendix A.** Comparison of Gender Identity and Racial/Ethnic Composition of Study Sample to American Born Bachelor's Degree Recipients in 2016 (NCES)

|                                                             | Sample (%)<br>(n=995) | NCES (%)<br>(n=1,836,468) |
|-------------------------------------------------------------|-----------------------|---------------------------|
| <i>Women</i>                                                |                       |                           |
| American Indian / Alaska Native                             | .20                   | .32                       |
| Asian / Native Hawaiian / Other Pacific Islander            | 3.92                  | 4.09                      |
| Black / African American                                    | 6.03                  | 6.78                      |
| Hispanic / Latino                                           | 6.73                  | 7.74                      |
| Multiracial                                                 | 2.81                  | 1.98                      |
| White                                                       | 35.88                 | 36.73                     |
| <i>Men</i>                                                  |                       |                           |
| American Indian / Alaska Native                             | .20                   | .21                       |
| Asian / Native Hawaiian / Other Pacific Islander            | 3.82                  | 3.44                      |
| Black / African American                                    | 5.63                  | 3.80                      |
| Hispanic / Latino                                           | 4.82                  | 5.06                      |
| Multiracial                                                 | 1.50                  | 1.37                      |
| White                                                       | 25.23                 | 28.47                     |
| <i>Transgender / Non-Binary / Genderqueer / Questioning</i> |                       |                           |
| American Indian / Alaska Native                             | .00                   | Not reported              |
| Asian / Native Hawaiian / Other Pacific Islander            | .20                   | Not reported              |
| Black / African American                                    | .40                   | Not reported              |
| Hispanic / Latino                                           | .60                   | Not reported              |
| Multiracial                                                 | .40                   | Not reported              |
| White                                                       | 1.61                  | Not reported              |

*Note:* Percentages for may not sum to 100 due to rounding.

Source: U.S. Department of Education, National Center for Education Statistics. 2018. *Table 322.40. Bachelor's Degrees Conferred to Males by Postsecondary Institutions, by Race/Ethnicity and Field of Study: 2014-15 and 2015-16.* and *Table 322.50. Bachelor's Degrees Conferred to Females by Postsecondary Institutions, by Race/Ethnicity and Field of Study: 2014-15 and 2015-16.*

**Appendix B.** Means and Standard Deviations for Depressive Symptoms and Anticipatory Stress Items by Gender Identity (n=995)

|                                                                                                      | Female              |      | Male                |      | Transgender / Non-Binary / Genderqueer Questioning |      |
|------------------------------------------------------------------------------------------------------|---------------------|------|---------------------|------|----------------------------------------------------|------|
|                                                                                                      | M                   | SD   | M                   | SD   | M                                                  | SD   |
| <i>Mental Health</i>                                                                                 |                     |      |                     |      |                                                    |      |
| Depressive Symptoms                                                                                  | 8.75 <sup>b,c</sup> | 5.25 | 7.13 <sup>a,c</sup> | 5.09 | 12.38 <sup>a,b</sup>                               | 5.79 |
| <i>Anticipatory Stress Items</i>                                                                     |                     |      |                     |      |                                                    |      |
| “When you think about the future, how frequently do you worry about the following...”                |                     |      |                     |      |                                                    |      |
| Finding a job.                                                                                       | 3.53 <sup>b</sup>   | 1.21 | 3.21 <sup>a</sup>   | 1.23 | 3.66                                               | 1.10 |
| Paying off student loans.                                                                            | 3.21 <sup>b</sup>   | 1.47 | 2.88 <sup>a</sup>   | 1.42 | 3.34                                               | 1.68 |
| Being able to live independently; that is, without financial support from your parents or guardians. | 3.49 <sup>b</sup>   | 1.35 | 3.06 <sup>a,c</sup> | 1.30 | 3.84 <sup>b</sup>                                  | 1.30 |
| Your long-term financial security.                                                                   | 3.77 <sup>b</sup>   | 1.14 | 3.42 <sup>a,c</sup> | 1.20 | 4.00 <sup>b</sup>                                  | 1.08 |
| Finding affordable housing.                                                                          | 3.60 <sup>b</sup>   | 1.25 | 3.29 <sup>a,c</sup> | 1.20 | 4.00 <sup>b</sup>                                  | 1.11 |
| Finding a career with long-term security.                                                            | 3.61                | 1.26 | 3.50                | 1.22 | 3.78                                               | 1.16 |
| Being able to own a home.                                                                            | 3.42 <sup>b</sup>   | 1.29 | 3.25 <sup>a</sup>   | 1.27 | 3.69                                               | 1.12 |
| Being able to live in a safe neighborhood.                                                           | 3.19                | 1.30 | 3.06                | 1.28 | 3.16                                               | 1.25 |
| The death of a family member.                                                                        | 3.03 <sup>b</sup>   | 1.23 | 2.81 <sup>a</sup>   | 1.25 | 3.22                                               | 1.26 |
| Being the victim of sexual assault.                                                                  | 2.33 <sup>b,c</sup> | 1.21 | 1.90 <sup>a,c</sup> | 1.22 | 3.03 <sup>a,b</sup>                                | 1.20 |
| Being the victim of a violent crime.                                                                 | 2.27 <sup>c</sup>   | 1.17 | 2.23 <sup>c</sup>   | 1.22 | 3.00 <sup>a,b</sup>                                | 1.02 |
| Experiencing discrimination due to your race.                                                        | 2.03                | 1.25 | 2.20                | 1.35 | 2.28                                               | 1.40 |
| Experiencing discrimination due to your gender identity.                                             | 2.23 <sup>b,c</sup> | 1.26 | 1.90 <sup>a,c</sup> | 1.24 | 3.91 <sup>a,b</sup>                                | 1.09 |
| Experiencing discrimination due to your sexual orientation.                                          | 1.81 <sup>c</sup>   | 1.18 | 1.93 <sup>c</sup>   | 1.27 | 3.56 <sup>a,b</sup>                                | 1.32 |
| n                                                                                                    | 553                 |      | 410                 |      | 32                                                 |      |

<sup>a</sup> Significantly different from female ( $p < .05$ )

<sup>b</sup> Significantly different from male ( $p < .05$ )

<sup>c</sup> Significantly different from transgender/non-binary/genderqueer/questioning at ( $p < .05$ )

**Appendix C.** Means and Standard Deviations for Depressive Symptoms and Anticipatory Stress Items by Race/Ethnicity (n=995)

|                                                                                                      | American<br>Indian / Alaska<br>Native |      | Asian / Native<br>Hawaiian /<br>Other Pacific<br>Islander |      | Black / African<br>American |      | Hispanic /<br>Latino |      | Multiracial         |      | White                   |      |
|------------------------------------------------------------------------------------------------------|---------------------------------------|------|-----------------------------------------------------------|------|-----------------------------|------|----------------------|------|---------------------|------|-------------------------|------|
|                                                                                                      | M                                     | SD   | M                                                         | SD   | M                           | SD   | M                    | SD   | M                   | SD   | M                       | SD   |
| <i>Mental Health</i>                                                                                 |                                       |      |                                                           |      |                             |      |                      |      |                     |      |                         |      |
| Depressive Symptoms                                                                                  | 5.75                                  | 2.75 | 6.75 <sup>b,c,e</sup>                                     | 4.47 | 8.23 <sup>a</sup>           | 5.47 | 8.76 <sup>a</sup>    | 5.44 | 8.09                | 4.64 | 8.29 <sup>a</sup>       | 5.39 |
| <i>Anticipatory Stress Items</i>                                                                     |                                       |      |                                                           |      |                             |      |                      |      |                     |      |                         |      |
| <i>“When you think about the future, how frequently do you worry about the following...”</i>         |                                       |      |                                                           |      |                             |      |                      |      |                     |      |                         |      |
| Finding a job.                                                                                       | 2.50                                  | .58  | 3.37                                                      | 1.20 | 3.50                        | 1.17 | 3.62 <sup>e</sup>    | 1.17 | 3.45                | 1.12 | 3.35 <sup>c</sup>       | 1.26 |
| Paying off student loans.                                                                            | 1.50                                  | .58  | 2.59 <sup>b,c,d,e</sup>                                   | 1.40 | 3.51 <sup>a,c,e</sup>       | 1.33 | 3.07 <sup>a,b</sup>  | 1.52 | 3.40 <sup>a</sup>   | 1.44 | 3.04 <sup>a,b</sup>     | 1.47 |
| Being able to live independently; that is, without financial support from your parents or guardians. | 2.50                                  | 1.00 | 3.15 <sup>b,c</sup>                                       | 1.30 | 3.59 <sup>a,e</sup>         | 1.34 | 3.55 <sup>a,e</sup>  | 1.32 | 3.55                | 1.41 | 3.24 <sup>b,c</sup>     | 1.34 |
| Your long-term financial security.                                                                   | 3.50                                  | 1.00 | 3.38 <sup>b,c</sup>                                       | 1.18 | 3.91 <sup>a,e</sup>         | 1.09 | 3.81 <sup>a,e</sup>  | 1.16 | 3.68                | 1.22 | 3.58 <sup>b,c</sup>     | 1.18 |
| Finding affordable housing.                                                                          | 3.75                                  | .96  | 3.09 <sup>b,c,d,e</sup>                                   | 1.18 | 3.71 <sup>a,e</sup>         | 1.19 | 3.68 <sup>a,e</sup>  | 1.30 | 3.79 <sup>a,e</sup> | 1.28 | 3.43 <sup>a,b,c,d</sup> | 1.22 |
| Finding a career with long-term security.                                                            | 3.00                                  | 1.41 | 3.66                                                      | 1.02 | 3.73 <sup>e</sup>           | 1.27 | 3.84 <sup>e</sup>    | 1.20 | 3.51                | 1.38 | 3.48 <sup>b,c</sup>     | 1.25 |
| Being able to own a home.                                                                            | 2.75                                  | 1.71 | 3.25                                                      | 1.17 | 3.58 <sup>e</sup>           | 1.28 | 3.50                 | 1.37 | 3.43                | 1.39 | 3.30 <sup>b</sup>       | 1.26 |
| Being able to live in a safe neighborhood.                                                           | 2.75                                  | 1.71 | 3.13                                                      | 1.21 | 3.44 <sup>e</sup>           | 1.31 | 3.37 <sup>e</sup>    | 1.38 | 3.21                | 1.38 | 3.03 <sup>b,c</sup>     | 1.25 |

|                                                             |      |     |                     |      |                         |      |                     |      |                     |      |                         |      |
|-------------------------------------------------------------|------|-----|---------------------|------|-------------------------|------|---------------------|------|---------------------|------|-------------------------|------|
| The death of a family member.                               | 2.50 | .58 | 2.70 <sup>b,d</sup> | 1.20 | 3.24 <sup>a,e</sup>     | 1.32 | 2.93                | 1.26 | 3.19 <sup>a</sup>   | 1.21 | 2.91 <sup>b</sup>       | 1.23 |
| Being the victim of sexual assault.                         | 2.25 | .96 | 1.99 <sup>b</sup>   | 1.10 | 2.45 <sup>a,e</sup>     | 1.43 | 2.37                | 1.38 | 2.00                | 1.04 | 2.12 <sup>b</sup>       | 1.19 |
| Being the victim of a violent crime.                        | 2.00 | .82 | 2.20 <sup>b</sup>   | 1.10 | 2.73 <sup>a,c,e</sup>   | 1.31 | 2.31 <sup>b</sup>   | 1.27 | 2.40                | 1.25 | 2.18 <sup>b</sup>       | 1.15 |
| Experiencing discrimination due to your race.               | 2.00 | .82 | 2.48 <sup>b,e</sup> | 1.24 | 3.32 <sup>a,c,d,e</sup> | 1.33 | 2.74 <sup>b,e</sup> | 1.30 | 2.70 <sup>b,e</sup> | 1.30 | 1.67 <sup>a,b,c,d</sup> | 1.05 |
| Experiencing discrimination due to your gender identity.    | 2.00 | .82 | 2.15 <sup>b</sup>   | 1.31 | 2.63 <sup>a,e</sup>     | 1.43 | 2.30 <sup>e</sup>   | 1.30 | 2.23                | 1.42 | 2.01 <sup>b,c</sup>     | 1.23 |
| Experiencing discrimination due to your sexual orientation. | 2.00 | .82 | 1.86                | 1.20 | 2.20 <sup>e</sup>       | 1.34 | 2.12 <sup>e</sup>   | 1.40 | 2.11                | 1.40 | 1.81 <sup>b,c</sup>     | 1.20 |
| n                                                           | 4    |     | 79                  |      | 120                     |      | 121                 |      | 47                  |      | 624                     |      |

<sup>a</sup> Significantly different from Asian/Native Hawaiian/Other Pacific Islander ( $p < .05$ )

<sup>b</sup> Significantly different from black/African American ( $p < .05$ )

<sup>c</sup> Significantly different from Hispanic/Latino ( $p < .05$ )

<sup>d</sup> Significantly different from multiracial ( $p < .05$ )

<sup>e</sup> Significantly different from white ( $p < .05$ )

**Appendix D.** Means and Standard Deviations for Depressive Symptoms and Anticipatory Stress Items by Sexual Orientation (n=995)

|                                                                                                      | Heterosexual /<br>Straight |      | Gay / Lesbian       |      | Bisexual             |      | Queer / Asexual /<br>Pansexual /<br>Demisexual |      |
|------------------------------------------------------------------------------------------------------|----------------------------|------|---------------------|------|----------------------|------|------------------------------------------------|------|
|                                                                                                      | M                          | SD   | M                   | SD   | M                    | SD   | M                                              | SD   |
| <i>Mental Health</i>                                                                                 |                            |      |                     |      |                      |      |                                                |      |
| Depressive Symptoms                                                                                  | 7.60 <sup>c,d</sup>        | 5.06 | 8.87 <sup>c,d</sup> | 5.99 | 11.54 <sup>a,b</sup> | 5.08 | 11.86 <sup>a,b</sup>                           | 5.95 |
| <i>Anticipatory Stress Items</i>                                                                     |                            |      |                     |      |                      |      |                                                |      |
| <i>“When you think about the future, how frequently do you worry about the following...”</i>         |                            |      |                     |      |                      |      |                                                |      |
| Finding a job.                                                                                       | 3.35 <sup>c,d</sup>        | 1.23 | 3.37                | 1.37 | 3.67 <sup>a</sup>    | 1.14 | 3.93 <sup>a</sup>                              | .90  |
| Paying off student loans.                                                                            | 3.05                       | 1.46 | 3.02                | 1.51 | 3.33                 | 1.43 | 3.04                                           | 1.73 |
| Being able to live independently; that is, without financial support from your parents or guardians. | 3.26 <sup>c,d</sup>        | 1.33 | 3.28 <sup>d</sup>   | 1.41 | 3.64 <sup>a</sup>    | 1.42 | 4.14 <sup>a,b</sup>                            | .93  |
| Your long-term financial security.                                                                   | 3.56 <sup>c</sup>          | 1.19 | 3.52 <sup>c</sup>   | 1.30 | 4.17 <sup>a,b</sup>  | .87  | 3.96                                           | 1.00 |
| Finding affordable housing.                                                                          | 3.41 <sup>c,d</sup>        | 1.25 | 3.37 <sup>c,d</sup> | 1.24 | 3.90 <sup>a,b</sup>  | 1.05 | 4.21 <sup>a,b</sup>                            | .88  |
| Finding a career with long-term security.                                                            | 3.53 <sup>c</sup>          | 1.23 | 3.43                | 1.41 | 3.88 <sup>a</sup>    | 1.18 | 3.75                                           | 1.29 |
| Being able to own a home.                                                                            | 3.34                       | 1.29 | 3.11 <sup>c</sup>   | 1.27 | 3.59 <sup>b</sup>    | 1.17 | 3.43                                           | 1.26 |
| Being able to live in a safe neighborhood.                                                           | 3.14                       | 1.29 | 2.85                | 1.40 | 3.23                 | 1.18 | 3.18                                           | 1.47 |
| The death of a family member.                                                                        | 2.89 <sup>c</sup>          | 1.23 | 2.72 <sup>c</sup>   | 1.29 | 3.36 <sup>a,b</sup>  | 1.23 | 3.29                                           | 1.33 |
| Being the victim of sexual assault.                                                                  | 2.09 <sup>c,d</sup>        | 1.19 | 2.33                | 1.35 | 2.66 <sup>a</sup>    | 1.45 | 2.61 <sup>a</sup>                              | 1.13 |
| Being the victim of a violent crime.                                                                 | 2.22 <sup>b,c</sup>        | 1.19 | 2.63 <sup>a</sup>   | 1.36 | 2.53 <sup>a</sup>    | 1.18 | 2.43                                           | .92  |
| Experiencing discrimination due to your race.                                                        | 2.11                       | 1.29 | 2.28                | 1.38 | 2.08                 | 1.36 | 1.86                                           | 1.11 |
| Experiencing discrimination due to your gender identity.                                             | 2.05 <sup>c,d</sup>        | 1.25 | 2.52                | 1.55 | 2.45 <sup>a</sup>    | 1.32 | 2.96 <sup>a</sup>                              | 1.32 |

|                                                                |                       |      |                     |      |                       |      |                     |      |
|----------------------------------------------------------------|-----------------------|------|---------------------|------|-----------------------|------|---------------------|------|
| Experiencing discrimination due to<br>your sexual orientation. | 1.68 <sup>b,c,d</sup> | 1.10 | 3.37 <sup>a,c</sup> | 1.39 | 2.72 <sup>a,b,d</sup> | 1.34 | 3.32 <sup>a,c</sup> | 1.22 |
| n                                                              | 815                   |      | 46                  |      | 106                   |      | 28                  |      |

<sup>a</sup> Significantly different from heterosexual/straight ( $p < .05$ )

<sup>b</sup> Significantly different from gay/lesbian ( $p < .05$ )

<sup>c</sup> Significantly different from bisexual ( $p < .05$ )

<sup>d</sup> Significantly different from queer/asexual/pansexual/demisexual ( $p < .05$ )

**Appendix E.** Means and Standard Deviations for Depressive Symptoms and Anticipatory Stress Items by First-Generation College Student Status (n=995)

|                                                                                                      | First-Generation  |      | Non-First-Generation |      |
|------------------------------------------------------------------------------------------------------|-------------------|------|----------------------|------|
|                                                                                                      | M                 | SD   | M                    | SD   |
| <i>Mental Health</i>                                                                                 |                   |      |                      |      |
| Depressive Symptoms                                                                                  | 8.33              | 5.25 | 8.12                 | 5.35 |
| <i>Anticipatory Stress Items</i>                                                                     |                   |      |                      |      |
| <i>“When you think about the future, how frequently do you worry about the following...”</i>         |                   |      |                      |      |
| Finding a job.                                                                                       | 3.50              | 1.21 | 3.35                 | 1.23 |
| Paying off student loans.                                                                            | 3.31 <sup>b</sup> | 1.43 | 2.94 <sup>a</sup>    | 1.47 |
| Being able to live independently; that is, without financial support from your parents or guardians. | 3.36              | 1.37 | 3.30                 | 1.33 |
| Your long-term financial security.                                                                   | 3.67              | 1.17 | 3.61                 | 1.19 |
| Finding affordable housing.                                                                          | 3.56              | 1.21 | 3.44                 | 1.24 |
| Finding a career with long-term security.                                                            | 3.66              | 1.22 | 3.52                 | 1.25 |
| Being able to own a home.                                                                            | 3.38              | 1.25 | 3.35                 | 1.29 |
| Being able to live in a safe neighborhood.                                                           | 3.16              | 1.25 | 3.12                 | 1.31 |
| The death of a family member.                                                                        | 2.98              | 1.29 | 2.93                 | 1.21 |
| Being the victim of sexual assault.                                                                  | 2.16              | 1.28 | 2.18                 | 1.22 |
| Being the victim of a violent crime.                                                                 | 2.30              | 1.24 | 2.26                 | 1.16 |
| Experiencing discrimination due to your race.                                                        | 2.17              | 1.31 | 2.07                 | 1.29 |
| Experiencing discrimination due to your gender identity.                                             | 2.10              | 1.26 | 2.17                 | 1.31 |
| Experiencing discrimination due to your sexual orientation.                                          | 1.89              | 1.23 | 1.93                 | 1.27 |
| n                                                                                                    | 365               |      | 630                  |      |

<sup>a</sup> Significantly different from first-generation ( $p < .05$ )

<sup>b</sup> Significantly different from non-first-generation ( $p < .05$ )

**Appendix F.** OLS Regressions of Depressive Symptoms on Anticipatory Stressors x Social Status (n=995)

|                                                                 | Worries<br>about<br>Economic<br>and<br>Residential<br>Security | Worries<br>about<br>Traumatic<br>Events | Worries about<br>Discrimination |
|-----------------------------------------------------------------|----------------------------------------------------------------|-----------------------------------------|---------------------------------|
|                                                                 | 1                                                              | 2                                       | 3                               |
| <i>Gender Identity (reference=male)</i>                         |                                                                |                                         |                                 |
| Female x Stressor                                               | .27<br>[.33]                                                   | .06<br>[.36]                            | -.08<br>[.34]                   |
| Transgender/Non-Binary/Genderqueer/<br>Questioning x Stressor   | -1.29<br>[1.30]                                                | .09<br>[1.54]                           | -1.04<br>[1.22]                 |
| <i>Race/Ethnicity (reference=multiracial)</i>                   |                                                                |                                         |                                 |
| American Indian/Alaska Native x<br>Stressor                     | -1.33<br>[1.70]                                                | 3.04<br>[.90]                           | 2.20<br>[.83]                   |
| Asian/Native Hawaiian/Other Pacific<br>Islander x Stressor      | .36<br>[.75]                                                   | .99<br>[.85]                            | .28<br>[.82]                    |
| Black/African American x Stressor                               | .69<br>[.77]                                                   | .97<br>[.82]                            | .72<br>[.86]                    |
| Hispanic/Latino x Stressor                                      | .54<br>[.74]                                                   | 1.82*<br>[.82]                          | 1.12<br>[.78]                   |
| White x Stressor                                                | 1.02<br>[.60]                                                  | 1.55*<br>[.69]                          | 1.01<br>[.69]                   |
| <i>Sexual Orientation<br/>(reference=heterosexual/straight)</i> |                                                                |                                         |                                 |
| Gay/Lesbian x Stressor                                          | .08<br>[.79]                                                   | .99<br>[.88]                            | 1.39<br>[.89]                   |
| Bisexual x Stressor                                             | .69<br>[.72]                                                   | .09<br>[.52]                            | .39<br>[.52]                    |
| Asexual/Pansexual/Demisexual/Queer x<br>Stressor                | -.42<br>[1.37]                                                 | .69<br>[1.22]                           | 1.76<br>[1.21]                  |
| First-Generation Student x Stressor                             | -.07<br>[.10]                                                  | -.10<br>[.13]                           | -.16<br>[.16]                   |
| Anticipatory Stressor                                           | .99<br>[.61]                                                   | -.07<br>[.70]                           | .21<br>[.70]                    |
| <i>Gender Identity (reference=male)</i>                         |                                                                |                                         |                                 |
| Female                                                          | -.05<br>[1.05]                                                 | 1.02<br>[.89]                           | 1.58*<br>[.71]                  |
| Transgender/Non-Binary/Genderqueer/<br>Questioning              | 6.57<br>[4.99]                                                 | 1.13<br>[4.89]                          | 4.05<br>[3.72]                  |
| <i>Race/Ethnicity (reference=multiracial)</i>                   |                                                                |                                         |                                 |

|                                                                |                   |                    |                    |
|----------------------------------------------------------------|-------------------|--------------------|--------------------|
| American Indian/Alaska Native                                  | 2.89<br>[5.28]    | -8.35<br>[2.28]    | -5.79<br>[1.93]    |
| Asian/Native Hawaiian/Other Pacific<br>Islander                | -1.60<br>[2.50]   | -2.96<br>[2.17]    | -1.22<br>[1.80]    |
| Black/African American                                         | -2.46<br>[2.61]   | -2.54<br>[2.24]    | -1.76<br>[2.05]    |
| Hispanic/Latino                                                | -1.42<br>[2.55]   | -4.06<br>[2.22]    | -2.06<br>[1.80]    |
| White                                                          | -2.64<br>[2.02]   | -3.10<br>[1.89]    | -1.04<br>[1.52]    |
| <i>Sexual Orientation</i><br>(reference=heterosexual/straight) |                   |                    |                    |
| Gay/Lesbian                                                    | 1.03<br>[2.73]    | -1.51<br>[2.21]    | -3.13<br>[2.22]    |
| Bisexual                                                       | .32<br>[2.73]     | 2.59<br>[1.60]     | 2.16<br>[1.27]     |
| Asexual/Pansexual/Demisexual/Queer                             | 4.31<br>[5.27]    | 1.14<br>[3.51]     | -1.79<br>[3.30]    |
| <i>Socioeconomic Status</i>                                    |                   |                    |                    |
| Family Household Income                                        | -.08<br>[.08]     | -.10<br>[.08]      | -.10<br>[.08]      |
| Free/Reduced Lunch Program                                     | .33<br>[.33]      | .35<br>[.35]       | .53<br>[.35]       |
| Works 20+ Hours Per Week                                       | -.08<br>[.31]     | -.14<br>[.33]      | -.27<br>[.33]      |
| <i>College/University Selectivity</i>                          |                   |                    |                    |
| Acceptance Rate                                                | .00<br>[.01]      | .01<br>[.01]       | .01<br>[.01]       |
| For-Profit Institution                                         | -.27<br>[.73]     | -.21<br>[.78]      | -.01<br>[.78]      |
| Grade Point Average                                            | -1.49***<br>[.32] | -2.02***<br>[.33]  | -2.06***<br>[.33]  |
| Age                                                            | .03<br>[.05]      | .05<br>[.05]       | .03<br>[.05]       |
| Constant                                                       | 7.55**<br>[2.55]  | 12.11***<br>[2.46] | 12.06***<br>[2.14] |
| R <sup>2</sup>                                                 | .22               | .17                | .14                |

*Note:* Unstandardized regression coefficients with standard errors in brackets. Models include post-stratification weights for sexual orientation.

\*  $p < .05$ , \*\*  $p < .01$ , \*\*\*  $p < .001$ .
